# Supplementary material for: Optical space-time wave packets having arbitrary group velocities in free space
Source: PubMed Central journal article supplement (PMC6389885; doi:10.1038/s41467-019-08735-8), 2019-02-25
Supplement: 41467_2019_8735_MOESM1_ESM.pdf [file 41467_2019_8735_MOESM1_ESM.pdf]

**Optical space-time wave packets having arbitrary group velocities  
in free space:**

**Supplementary Material**

Kondakci *et al.*

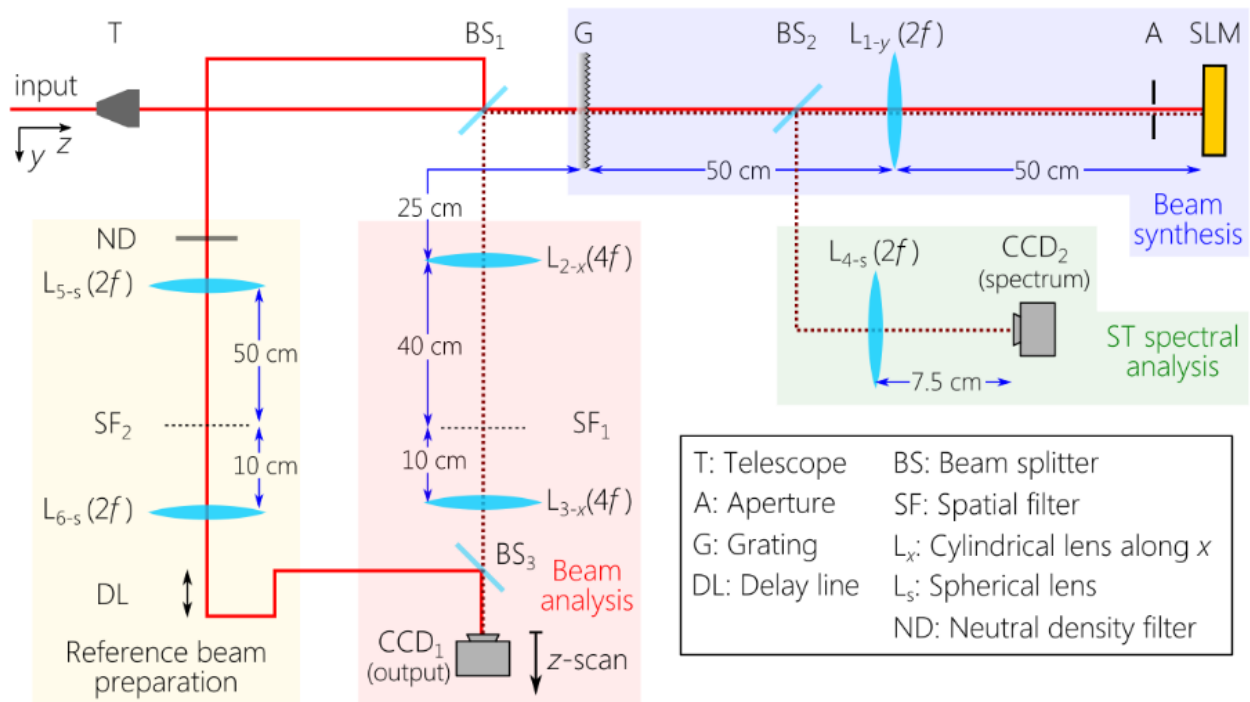

**Supplementary Figure 1.**

**Detailed experimental setup.** The experimental arrangement shown schematically in Fig. 2a in the main text is presented here in detail. The setup comprises four sections for space-time (ST) wave packet synthesis and characterization. The acronyms on all the optical components are provided in the inset box.

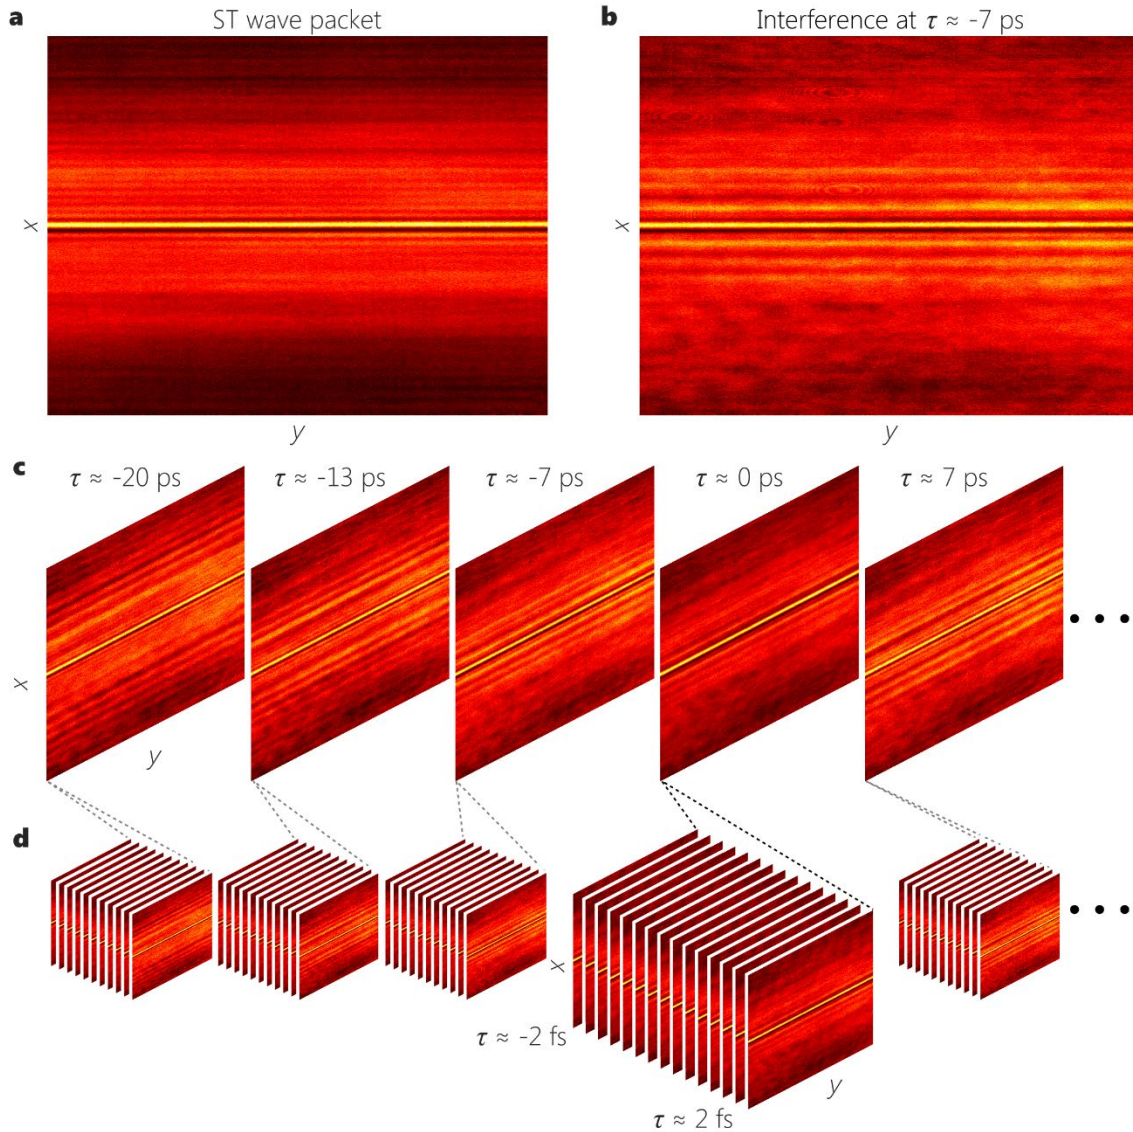

**Supplementary Figure 2.**

**Restructuring the spatio-temporal wave packet profile from interferometric measurements.**

**a**, Time-integrated beam profile of a ST wave packet recorded by a slow detector ( $\text{CCD}_1$ ) at a fixed propagation distance. In absence of the reference or if the reference and ST wave packet do not overlap in time, off-axis spatial interference along  $x$  is absent. **b**, Spatially-resolved interference fringes along the  $x$ -axis for a delay  $\tau \approx 7$  ps, resulting from the overlap of the reference and ST wave packet in time. **c**, The visibility of the spatially resolved interference fringes changes as the delay is scanned around the center of the ST wave packet. **d**, A set of measurements with small delay increments are taken to obtain the visibility  $\nu$  near the vicinity of any selected  $\tau$ . Each set of such measurements yields a single line in the spatio-temporal profile  $I(x, 0, \tau)$  given in Fig. 3b in the main text.

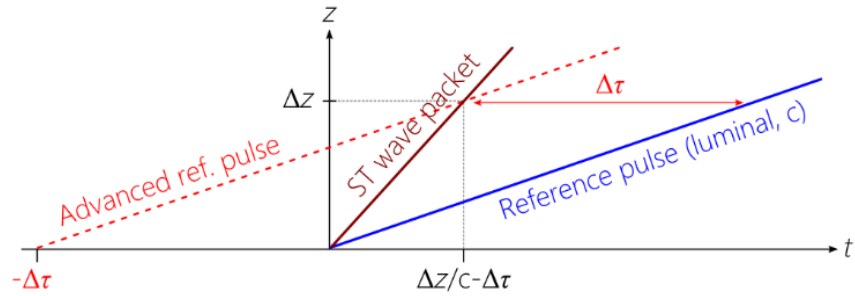

### Supplementary Figure 3.

**Space-time-diagram for determining the group velocity of ST wave packets.** The experiment starts with the ST wave packet and reference pulse overlapping in space and time, resulting in high-visibility spatially resolved fringes (Supplementary Figure 2b). A common distance  $\Delta z$  is introduced into the path of the ST wave packet and the reference pulse by moving  $\text{CCD}_1$  (Supplementary Figure 1), which results in a loss of the interference fringes (Supplementary Figure 2a). A delay  $\Delta\tau$  is then introduced into the path of the reference pulse to regain the visibility of the spatially resolved interference fringes (Supplementary Figure 2c).

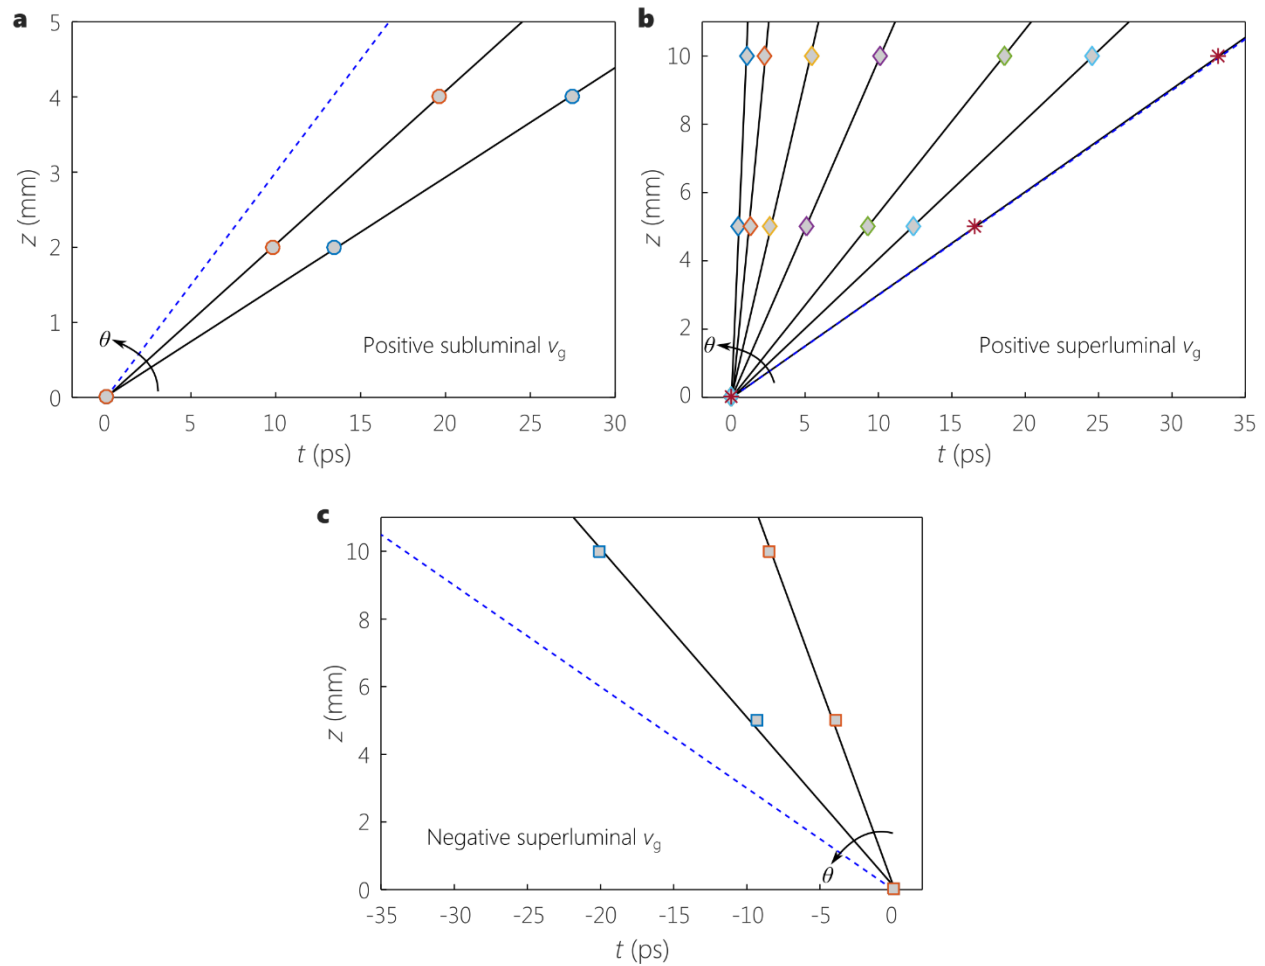

#### Supplementary Figure 4.

**Space-time-diagram measurements of ST wave packets to estimate their group velocities. a,** Positive subluminal ST wave packets lie below the light line  $v_g = c$  (blue-dashed). A retardation of the reference pulse is required to obtain maximum visibility. **b,** Positive superluminal ST wave packets lie above the light line with a positive slope. An advancement of the reference pulse is required to obtain maximum visibility. The luminal ST wave packet, which coincides – as expected – with the light line (data points represented by stars) is produced by idling the SLM. **c,** Negative superluminal ST wave packets lie above the light line with a negative slope  $v_g = -c$ . An advancement of the reference pulse is required to obtain maximum visibility. Note that the required advancement here exceeds that of the case of positive superluminal ST wave packets. **a-c,** In all cases, three measurements are taken at three points in  $z$  and the required advancement or retardation of the reference pulse that gives the maximum visibility is recorded. One of the observation points set to be origin ( $z = 0$ ). The black lines are linear fits.

**Supplementary Table 1.**

Measurement results and theoretical expectation for the group velocity of ST wave packets in free space

|      | $\theta$ | Wave packet type      | $v_g$  | $\Delta v_g$            | Theory | Conic section |
|------|----------|-----------------------|--------|-------------------------|--------|---------------|
| (1)  | 26.6°    | Positive subluminal   | 0.49c  | $\pm 3 \times 10^{-4}c$ | 0.5c   | ellipse       |
| (2)  | 34.6°    | Positive subluminal   | 0.68c  | $\pm 2 \times 10^{-5}c$ | 0.69c  | ellipse       |
| (3)  | 45°      | Positive luminal      | c      | $\pm 3 \times 10^{-5}c$ | c      | line          |
| (4)  | 53.3°    | Positive superluminal | 1.36c  | $\pm 4 \times 10^{-4}c$ | 1.34c  | hyperbola     |
| (5)  | 61.1°    | Positive superluminal | 1.80c  | $\pm 3 \times 10^{-4}c$ | 1.81c  | hyperbola     |
| (6)  | 73.4°    | Positive superluminal | 3.29c  | $\pm 2 \times 10^{-4}c$ | 3.36c  | hyperbola     |
| (7)  | 80.7°    | Positive superluminal | 6.17c  | $\pm 0.02c$             | 6.14c  | hyperbola     |
| (8)  | 86.4°    | Positive superluminal | 14.86c | $\pm 1.07c$             | 15.9c  | hyperbola     |
| (9)  | 88.5°    | Positive superluminal | 32.86c | $\pm 2.18c$             | 39.21c | hyperbola     |
| (10) | 104.2°   | Negative superluminal | -3.94c | $\pm 0.03c$             | -3.94c | hyperbola     |
| (11) | 120.6°   | Negative superluminal | -1.66c | $\pm 5 \times 10^{-3}c$ | -1.69c | Hyperbola     |

The group velocity  $v_g$  of the ST wave packets are arranged in order of increasing value of  $\theta$  in the range  $0 < \theta < 180^\circ$ . The theoretical values correspond to  $v_g = \tan \theta$ , and  $\Delta v_g$  is the uncertainty in the measured value of  $v_g$ .
